# Supplementary material
Source: Elsevier journal article supplement (https://www.sciencedirect.com/science/article/pii/S0301054620300069)
Supplement: mmc1 [file S0301054620300069:mmc1.docx]

**APPENDIX 1**

# FOOD ALLERGY AT SCHOOL. PRE-TRAINING SURVEY

This survey is anonymous and the results will be kept strictly confidential.

We would like to assess knowledge of the management of food allergy and allergic reactions among school staff.

School:

Municipality:

Profession/position: ________________________________________________________

Age:

Age of students in your charge: _____________________________

Please tick the correct answer:

1. Do any students in your charge have a food allergy?

 Yes How many?

 No

1. Do you have a Student’s Allergic Reaction Management Plan in your centre, with the student's identification and name of the medication in writing in case of reaction?

 Yes

 No

1. Did you have a meeting with the allergic student’s parents or guardians to discuss the details of his/her allergy?

 Yes

 No

1. Has any student in your charge ever suffered anaphylaxis?

 Yes. How many?

 No

1. Do you believe you would recognise an allergic reaction?

 Yes. Please describe some symptoms:

 No

1. Do you believe you would recognise an anaphylactic reaction?

 Yes. Please describe it:

 No

1. Are you confident you know WHEN you should administer adrenaline to a student?

 Yes:

 No

1. Are you confident you know HOW you should administer adrenaline to a student?

 Yes. Please explain:

 No

1. Are you confident you know HOW TO ACT after the administration of adrenaline to a student?

 Yes:

 No

1. Which is the most important medication to administer to a child if anaphylaxis appears?

 Salbutamol

 Corticosteroids

 Adrenaline

Antihistamine

1. Do you know where you can find an adrenaline auto-injector in case of anaphylaxis?

- Yes
- No

Thank you for your cooperation.
