# Supplementary material
Source: Elsevier journal article supplement (https://www.sciencedirect.com/science/article/pii/S0301054620300069)
Supplement: mmc2 [file S0301054620300069:mmc2.docx]

# APPENDIX 2

# FOOD ALLERGY AT SCHOOL. POST-TRAINING SURVEY

1. Do you believe this educational session has improved your knowledge of food allergy and anaphylaxis?

YES 

NO  Why?..........................................

1. Do you think it will help you to know WHEN to administer adrenaline?

YES 

NO  Why?..........................................

1. Do you think it will help you to know HOW to administer adrenaline?

YES 

NO  Why?..........................................

1. Has this educational session met your expectations?

YES 

NO  Why?..........................................

1. Did the speaker(s) communicate clearly?

YES 

NO 

1. Would you advise someone else to attend this educational session?

YES 

NO 

1. What is your degree of satisfaction?

1. Totally satisfied 

2. Satisfied 

3. Not satisfied 

1. Please describe anaphylaxis.
2. Which treatment is used for anaphylaxis?

1. Have you identified things that were not done correctly in your centre? Please tick the items identified:

 No Student’s Allergic Reaction Management Plan available

 Insufficient communication with parents/guardians

 Not knowing the location of the adrenaline auto-injector

 Adrenaline expiration date not checked

 Not knowing exactly when to administer adrenaline

 Not knowing exactly how to administer adrenaline

 Not knowing exactly what to do after administering adrenaline

Please note briefly anything you think you did not do correctly, or that you did not know:

**NOTE**: If you wish, you can write down any suggestions or comments, or state your opinion about aspects that you think have not been addressed in this survey.

Thank you for your cooperation.
